# Supplementary figures and images for: Clinically Significant Improved Fitness and Weight Loss Among Overweight Persons With Serious Mental Illness
Source: Atypon-hosted journal article supplement (doi:10.1176/appi.ps.003622012), 2013-05-17

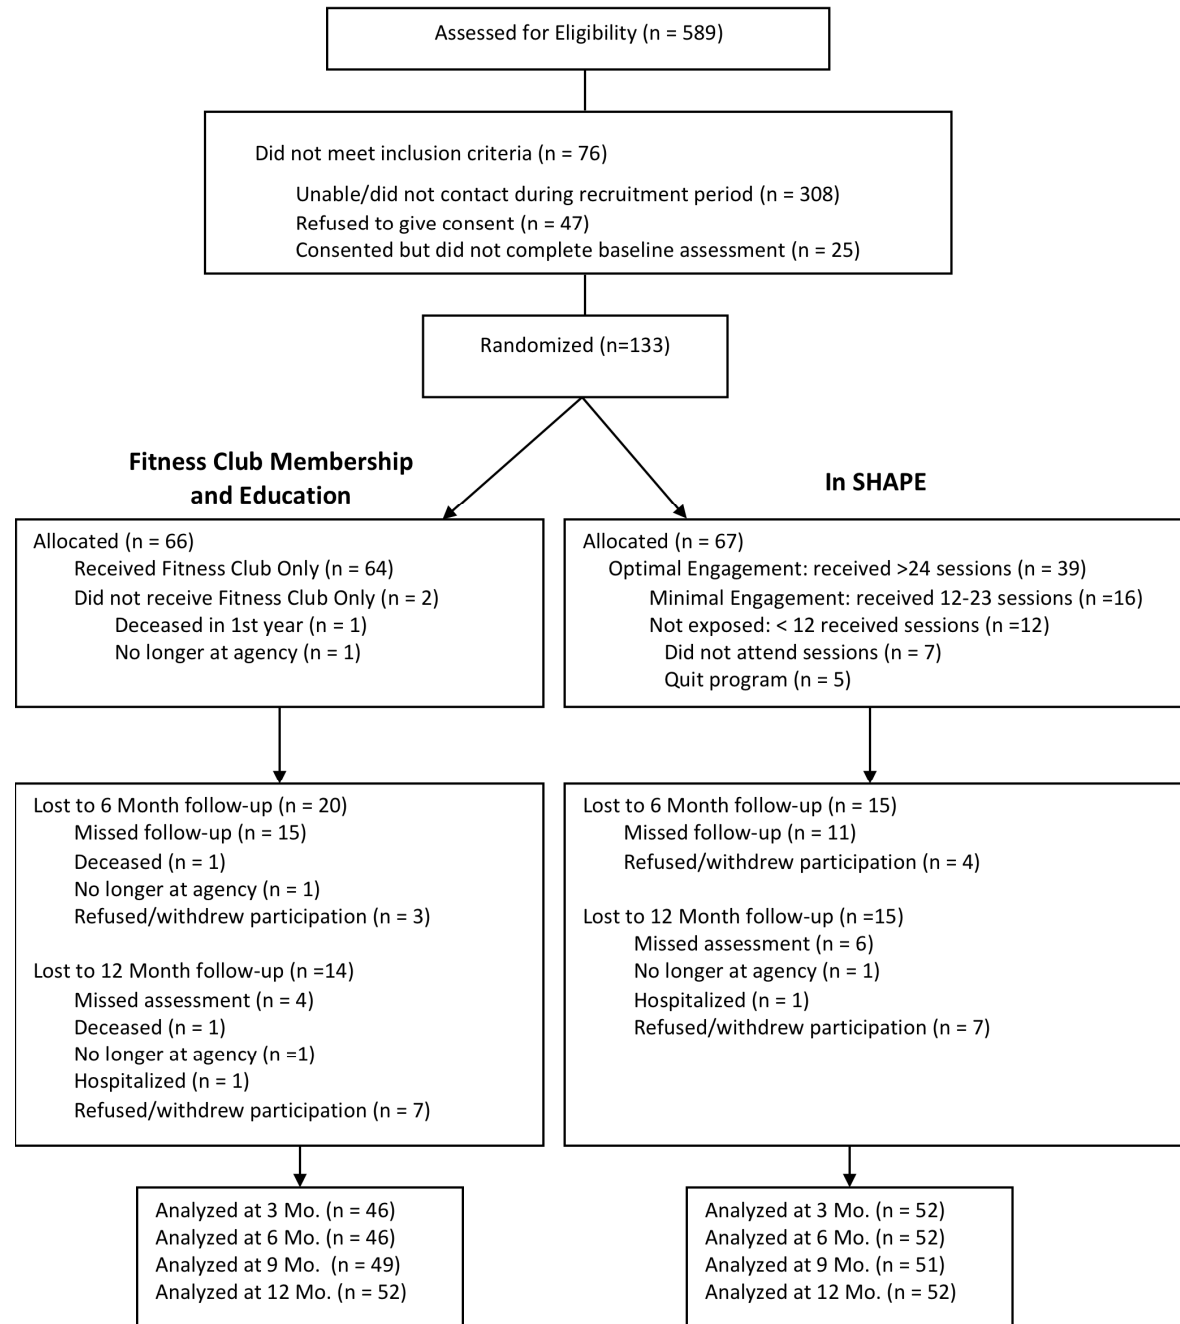

Supplement: 729_ds001.pdf [file 729_ds001.pdf]
